# Supplementary material for: Heterogeneous H2O2-based selective oxidations over zirconium tungstate α-ZrW2O8
Source: Royal Society of Chemistry journal article supplement (doi:10.1039/d3dt03495j), 2023-12-12
Supplement: d3dt03495j1.pdf [file d3dt03495j1.pdf]

## Supporting information

### Heterogeneous H<sub>2</sub>O<sub>2</sub>-based selective oxidations over zirconium tungstate $\alpha$ -ZrW<sub>2</sub>O<sub>8</sub>

Vasilii Yu. Evtushok,<sup>1</sup> Irina D. Ivanchikova,<sup>1</sup> Olga V. Zalomaeva,<sup>1</sup> Alexander I. Gubanov,<sup>2</sup>  
Boris A. Kolesov,<sup>2</sup> Tatiana S. Glazneva,<sup>1</sup> Oxana A. Kholdeeva<sup>1,\*</sup>

<sup>1</sup>Boreskov Institute of Catalysis, Pr. Lavrentieva 5, Novosibirsk 630090, Russia

<sup>2</sup>Nikolaev Institute of Inorganic Chemistry, Pr. Lavrentieva 3, Novosibirsk 630090, Russia

\* Corresponding author: [khold@catalysis.ru](mailto:khold@catalysis.ru)

### Table of Contents

|                                                                                                                                                                                                                                            |       |
|--------------------------------------------------------------------------------------------------------------------------------------------------------------------------------------------------------------------------------------------|-------|
| <b>Catalyst characterisation</b>                                                                                                                                                                                                           | p. 2  |
| <b>Table S1.</b> EDX data for ZrW <sub>2</sub> O <sub>8</sub> -A                                                                                                                                                                           | p. 2  |
| <b>Figure S1.</b> PXRD patterns of ZrW <sub>2</sub> O <sub>8</sub> -A and ZrW <sub>2</sub> O <sub>8</sub> -D                                                                                                                               | p. 2  |
| <b>Figure S2.</b> PXRD patterns of ZrW <sub>2</sub> O <sub>8</sub> -A and ZrW <sub>2</sub> O <sub>8</sub> -A after H <sub>2</sub> O <sub>2</sub> treatment under conditions similar to epoxidation reactions                               | p. 2  |
| <b>Figure S3.</b> Adsorption isotherms of ZrW <sub>2</sub> O <sub>8</sub> -A before and after cyclooctene oxidation reaction                                                                                                               | p. 3  |
| <b>Table S2.</b> N <sub>2</sub> adsorption data for ZrW <sub>2</sub> O <sub>8</sub> -A before and after cyclooctene oxidation reaction                                                                                                     | p. 3  |
| <b>Figure S4.</b> SEM images of ZrW <sub>2</sub> O <sub>8</sub> -D                                                                                                                                                                         | p. 4  |
| <b>Figure S5.</b> IR spectra of ZrW <sub>2</sub> O <sub>8</sub> -A immediately after calcination at 500 °C and after prolonged exposure to air                                                                                             | p. 5  |
| <b>Figure S6.</b> Raman spectra of ZrW <sub>2</sub> O <sub>8</sub> -A, -B, -C, and -D immediately after calcination at 500 °C                                                                                                              | p. 5  |
| <b>Figure S7.</b> Raman spectra of ZrW <sub>2</sub> O <sub>8</sub> -A, ZrW <sub>2</sub> O <sub>8</sub> -B, and ZrW <sub>2</sub> O <sub>8</sub> -D before and after addition of 15 wt. % aqueous H <sub>2</sub> O <sub>2</sub>              | p. 6  |
| <b>Catalytic properties of ZrW<sub>2</sub>O<sub>8</sub></b>                                                                                                                                                                                | p. 7  |
| <b>Figure S8.</b> Kinetic curves for a) H <sub>2</sub> O <sub>2</sub> decomposition over ZrW <sub>2</sub> O <sub>8</sub> -A in the absence of organic substrate at 30-70 °C and b) CyO epoxidation over ZrW <sub>2</sub> O <sub>8</sub> -A | p. 7  |
| <b>Figure S9.</b> Hot catalyst filtration test for oxidative cleavage of <i>trans</i> -cyclohexanediol                                                                                                                                     | p. 7  |
| <b>Table S3.</b> Effect of water, acid and base additives on CyO epoxidation with H <sub>2</sub> O <sub>2</sub> over ZrW <sub>2</sub> O <sub>8</sub>                                                                                       | p. 8  |
| <b>Table S4.</b> Structures of alkenes and corresponding products for Tables 6 and 7                                                                                                                                                       | p. 9  |
| <b>Table S5.</b> Effect of solvent on 3-carene oxidation with H <sub>2</sub> O <sub>2</sub> over ZrW <sub>2</sub> O <sub>8</sub>                                                                                                           | p. 10 |

## Catalyst characterisation

**Table S1.** EDX data for  $\text{ZrW}_2\text{O}_8\text{-A}$ .

| Element | Weight % | Atomic % |
|---------|----------|----------|
| O K     | 22.78    | 73.17    |
| Zr L    | 18.47    | 10.41    |
| W M     | 58.75    | 16.43    |

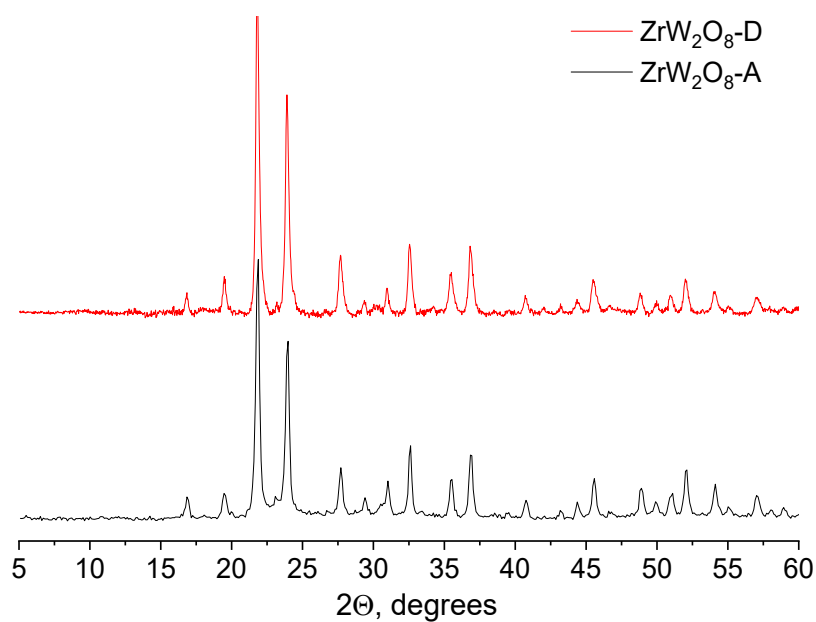

**Figure S1.** PXRD patterns of  $\text{ZrW}_2\text{O}_8\text{-A}$  and  $\text{ZrW}_2\text{O}_8\text{-D}$ .

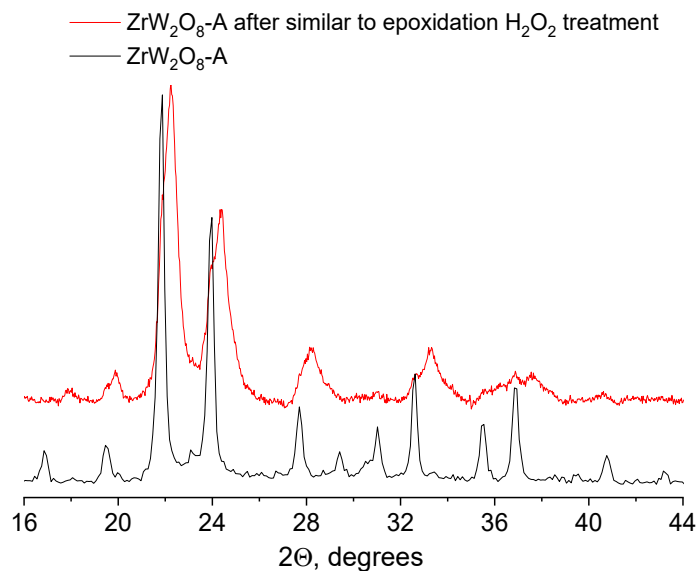

**Figure S2.** PXRD patterns of  $\text{ZrW}_2\text{O}_8\text{-A}$  and  $\text{ZrW}_2\text{O}_8\text{-A}$  after  $\text{H}_2\text{O}_2$  treatment under conditions similar to epoxidation reactions ( $\text{ZrW}_2\text{O}_8\text{-A}$  0.300 g,  $[\text{H}_2\text{O}_2] = 0.2$  M,  $\text{CH}_3\text{CN}$  10 mL, 120 min,  $50^\circ\text{C}$ ).

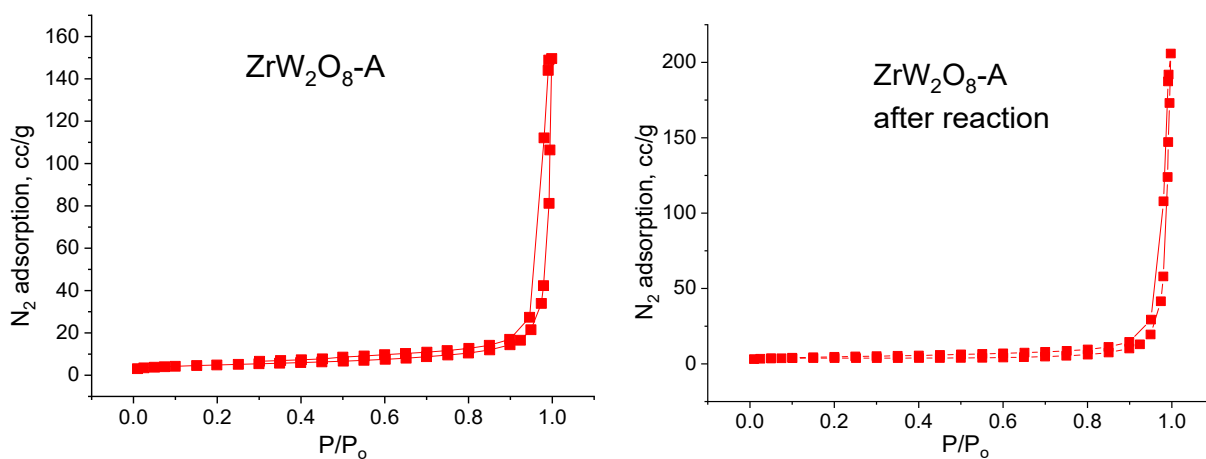

**Figure S3.** Adsorption isotherms of  $\text{ZrW}_2\text{O}_8\text{-A}$  before and after cyclooctene oxidation reaction (Reaction conditions:  $[\text{CyO}] = 0.1 \text{ M}$ ,  $[\text{H}_2\text{O}_2] = 0.2 \text{ M}$ ,  $\text{ZrW}_2\text{O}_8\text{-A}$  30 mg,  $\text{CH}_3\text{CN}$  1 mL,  $50 \text{ }^\circ\text{C}$ ).

**Table S2.**  $\text{N}_2$  adsorption data for  $\text{ZrW}_2\text{O}_8\text{-A}$  before and after cyclooctene oxidation reaction.

|                                           | $\text{ZrW}_2\text{O}_8\text{-A}$ | $\text{ZrW}_2\text{O}_8\text{-A}$ after reaction |
|-------------------------------------------|-----------------------------------|--------------------------------------------------|
| $S_{\text{BET}}$ , $\text{m}^2/\text{g}$  | 17                                | 15                                               |
| $V_{\text{micro}}$ , $\text{cc}/\text{g}$ | 0.001(t-plot)/0.001(DFT)          | 0.004(t-plot)/0(DFT)                             |
| $V_{\text{meso}}$ , $\text{cc}/\text{g}$  | 0.051(DFT)/0.037(BJH)             | 0.062(DFT)/0.045(BJH)                            |

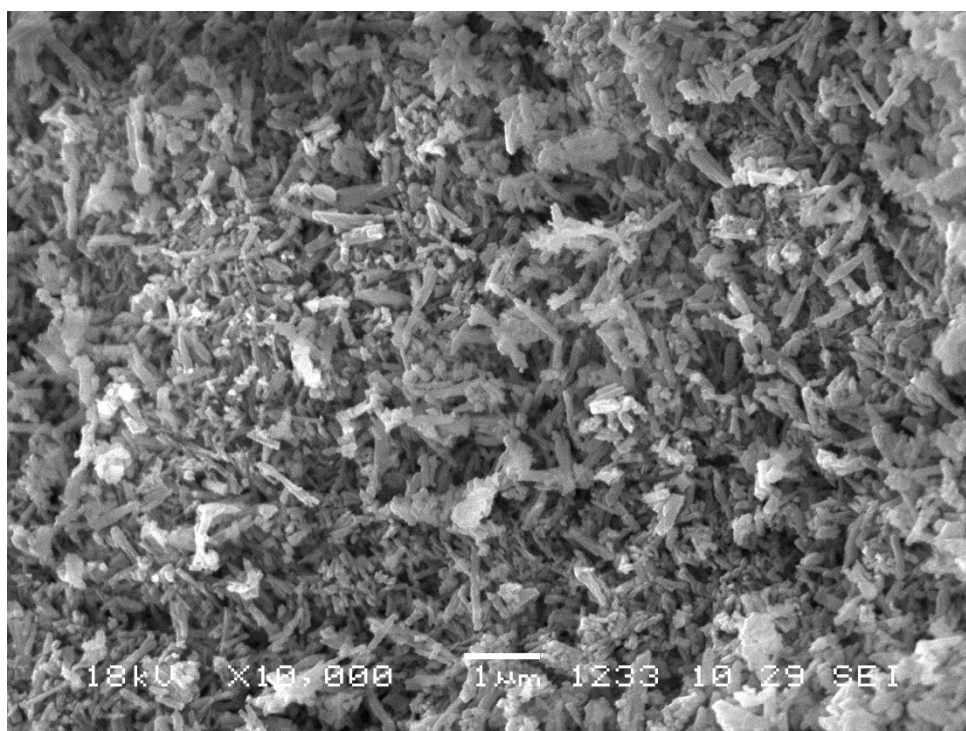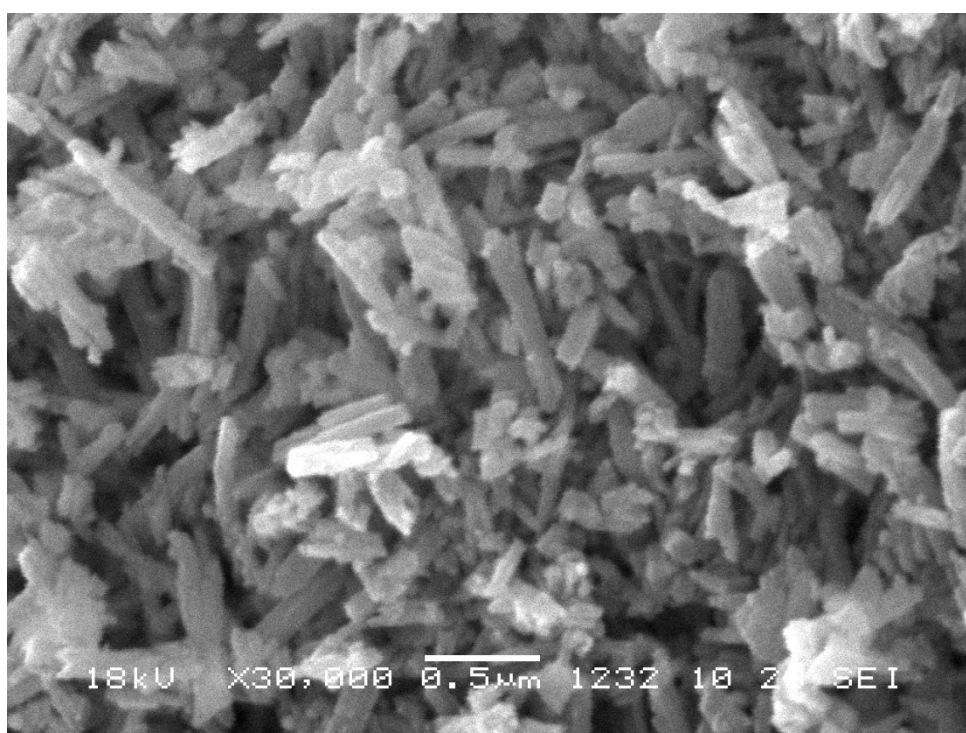

**Figure S4.** SEM images of ZrW<sub>2</sub>O<sub>8</sub>-D.

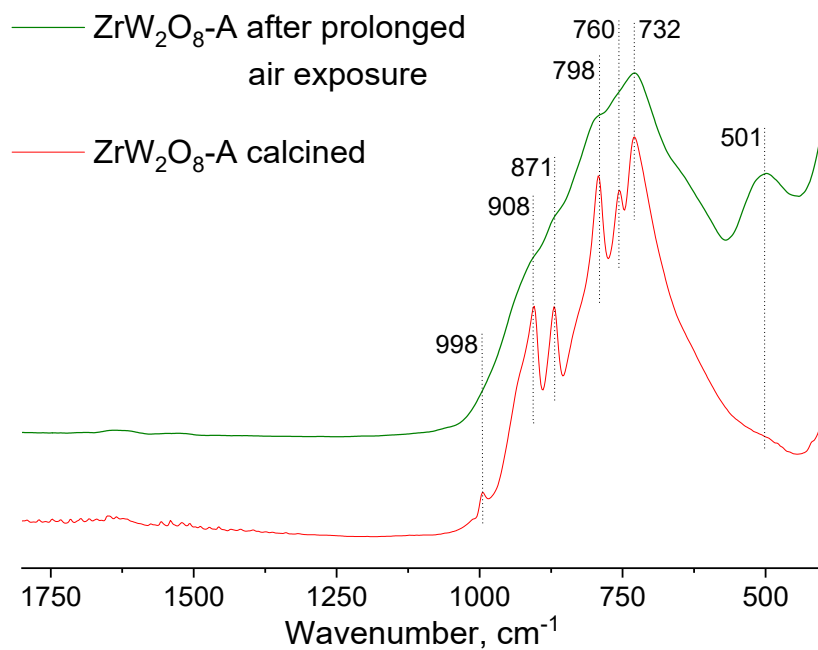

**Figure S5.** IR spectra of ZrW<sub>2</sub>O<sub>8</sub>-A immediately after calcination at 500 °C and after prolonged exposure to air.

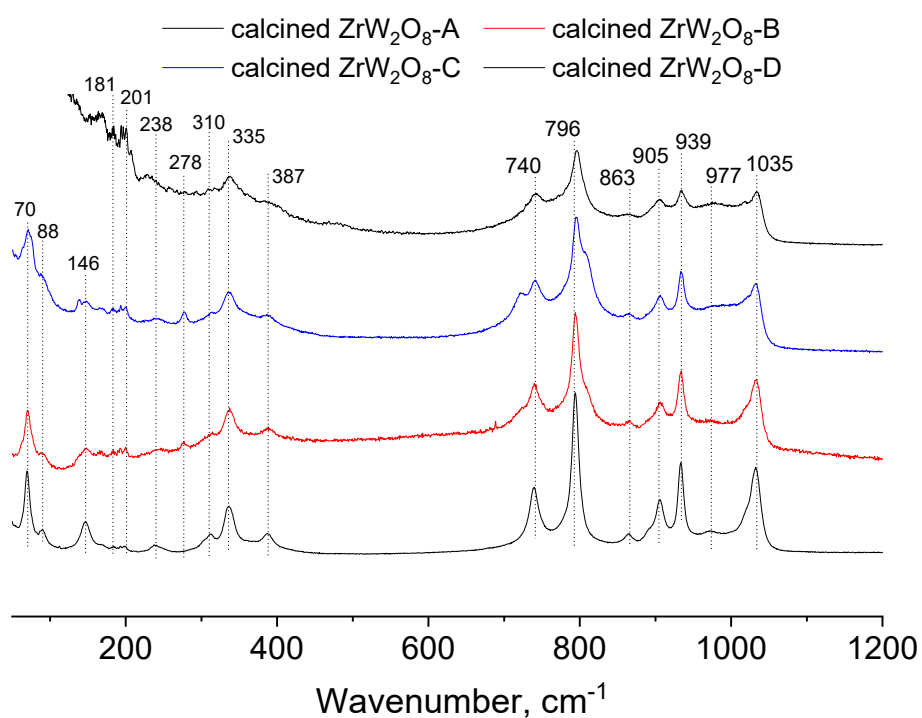

**Figure S6.** Raman spectra of ZrW<sub>2</sub>O<sub>8</sub>-A, -B, -C, and -D immediately after calcination at 500 °C.

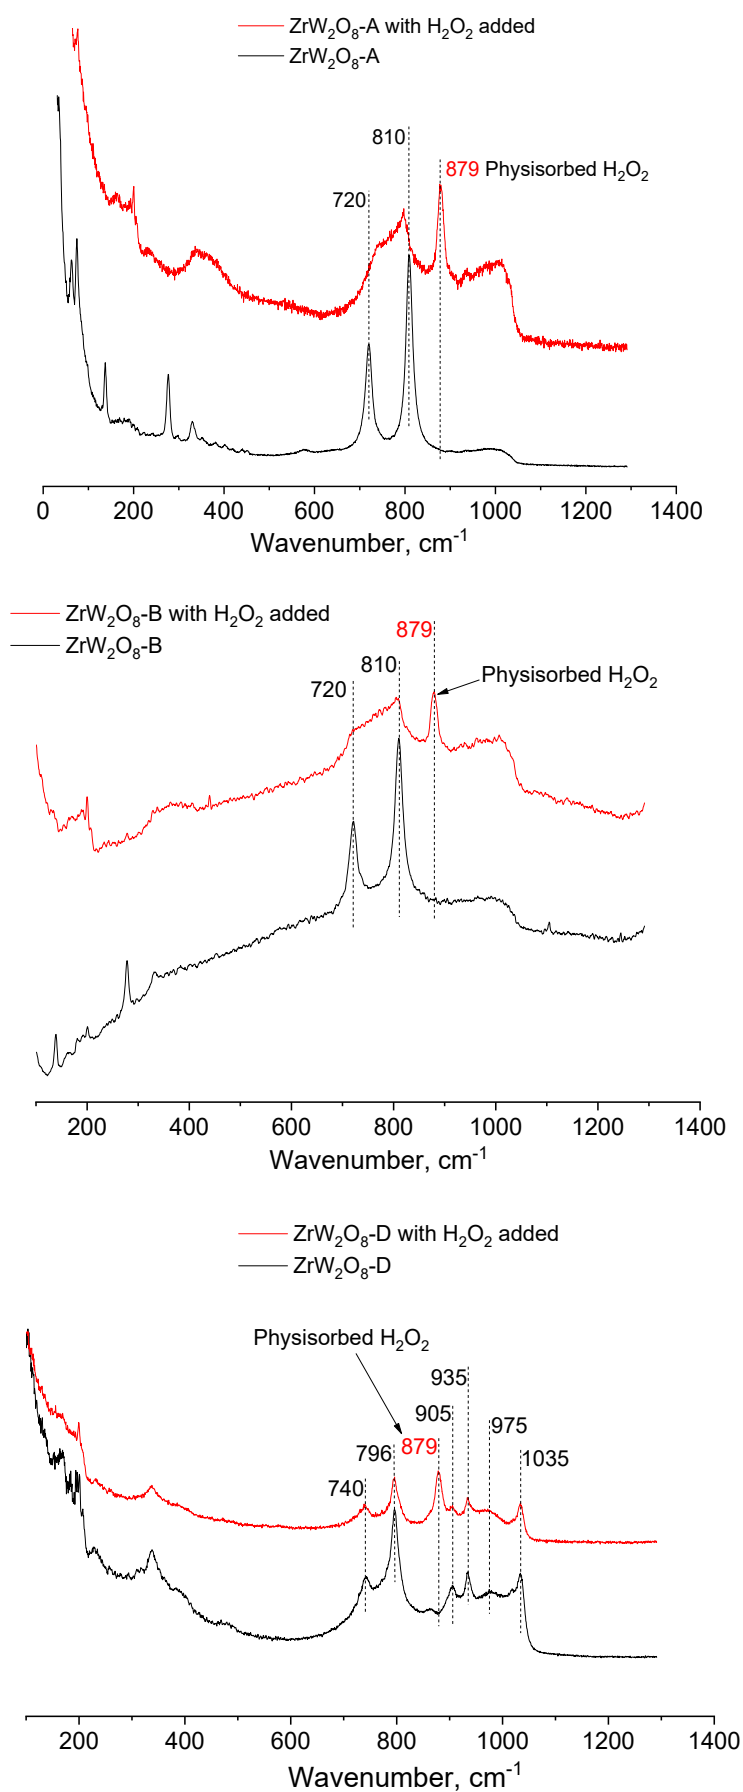

**Figure S7.** Raman spectra of ZrW<sub>2</sub>O<sub>8</sub>-A, ZrW<sub>2</sub>O<sub>8</sub>-B, and ZrW<sub>2</sub>O<sub>8</sub>-D before and after addition of 15 wt. % aqueous H<sub>2</sub>O<sub>2</sub>.

## Catalytic properties of $\text{ZrW}_2\text{O}_8$

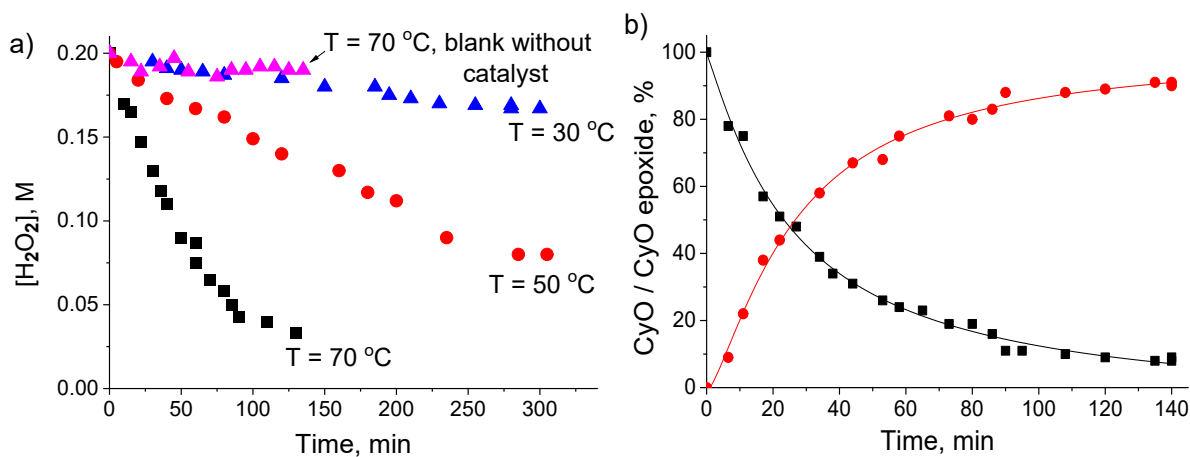

**Figure S8.** Kinetic curves for a)  $\text{H}_2\text{O}_2$  decomposition over  $\text{ZrW}_2\text{O}_8$ -A in the absence of organic substrate at 30-70 °C (Reaction conditions:  $[\text{H}_2\text{O}_2] = 0.2$  M,  $\text{ZrW}_2\text{O}_8$ -A 0.180 g,  $\text{CH}_3\text{CN}$  6 mL) and b) CyO epoxidation over  $\text{ZrW}_2\text{O}_8$ -A (Reaction conditions:  $[\text{CyO}] = 0.1$  M,  $[\text{H}_2\text{O}_2] = 0.2$  M,  $\text{ZrW}_2\text{O}_8$ -A 0.030 g,  $\text{CH}_3\text{CN}$  1 mL,  $50^\circ\text{C}$ ).

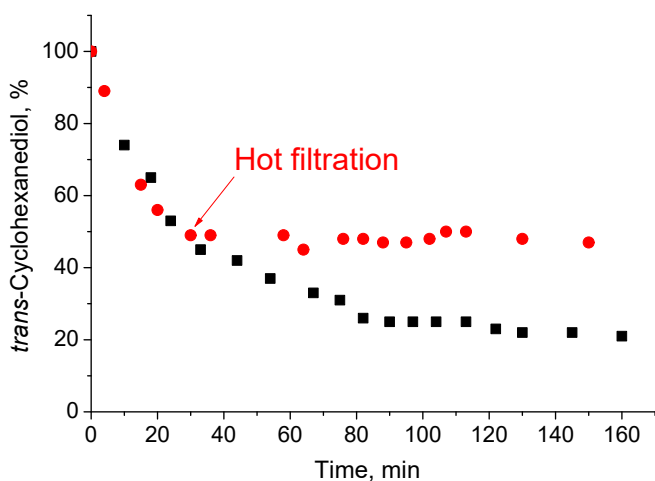

**Figure S9.** Hot catalyst filtration test for oxidative cleavage of *trans*-cyclohexanediol. Reaction conditions:  $[\text{CH-diol}] = 0.1$  M,  $[\text{H}_2\text{O}_2] = 0.8$  M,  $\text{ZrW}_2\text{O}_8$ -B 0.030 g,  $\text{CH}_3\text{CN}$  1 mL,  $70^\circ\text{C}$ .

**Table S3.** Effect of water, acid and base additives on CyO epoxidation with H<sub>2</sub>O<sub>2</sub> over ZrW<sub>2</sub>O<sub>8</sub>

| Entry           | Additive, mmol             | Conversion CyO, % | Select. Epoxide <sup>a</sup> , % |
|-----------------|----------------------------|-------------------|----------------------------------|
| 1 <sup>b</sup>  | none                       | 86                | 98                               |
| 2               | none                       | 90                | 98                               |
| 3               | H <sub>2</sub> O<br>0.1    | 90                | 98                               |
| 4               | H <sub>2</sub> O<br>0.5    | 87                | 85                               |
| 5               | H <sub>2</sub> O<br>1.0    | 85                | 80                               |
| 6               | HClO <sub>4</sub><br>0.05  | 88                | 5 <sup>c</sup>                   |
| 7               | HClO <sub>4</sub><br>0.005 | 87                | 63                               |
| 8 <sup>d</sup>  | HClO <sub>4</sub><br>0.005 | 57                | 5                                |
| 9               | NaOAc<br>0.05              | 50                | 1-2 <sup>c</sup>                 |
| 10              | NaOAc<br>0.005             | 33                | 48                               |
| 11 <sup>d</sup> | NaOAc<br>0.005             | 30                | 5                                |

Reaction conditions: [CyO] = 0.1 M, [H<sub>2</sub>O<sub>2</sub>] = 0.2 M, [H<sub>2</sub>O] = 0.7–1.7 M, catalyst ZrW<sub>2</sub>O<sub>8</sub>-A 0.030 g, CH<sub>3</sub>CN 1 mL, 120 min, 50 °C.

<sup>a</sup> Epoxide yield based on substrate consumed.

<sup>b</sup> 77 wt.% H<sub>2</sub>O<sub>2</sub> was employed instead of 30% H<sub>2</sub>O<sub>2</sub>, [H<sub>2</sub>O] = 0.125 M.

<sup>c</sup> Numerous unidentified side-products.

<sup>d</sup> Blank experiments without ZrW<sub>2</sub>O<sub>8</sub> catalyst.

The calculation of the relevant amount of additives was made on the assumption that there is one active site per 9.2×9.2 Å unit cell area. Taking into account the surface area of the sample determined from low-temperature N<sub>2</sub> adsorption data (Table S2), we could then estimate that the content of active sites in ZrW<sub>2</sub>O<sub>8</sub> is about 30 μmol/g. The addition of small amounts of HClO<sub>4</sub> (0.005 mmol, which is roughly 5 equiv. relative to the estimated number of active sites on the surface of 30 mg of ZrW<sub>2</sub>O<sub>8</sub>) reduced the epoxide selectivity quite strongly while, with large amounts of acid (0.05 mmol), selectivity was almost zero and a large number of unidentified products was formed. At the same time, the achievable conversion and reaction rate remained practically unchanged, which suggests that the acid apparently does not protonate the active centres. As in the case of increasing water concentration, the reason for the decrease in selectivity is, most likely, acceleration of side reactions involving the epoxide.

On the other hand, small additives of basic sodium acetate led to strong decrease in the conversion, reaction rate, and selectivity (Table S4). The inhibitory effect of sodium acetate could be related to possible deprotonation of active sites, but this seems unlikely, since separate treatment of the catalyst with sodium acetate did not lead to any change in its catalytic characteristics. We may assume that the inhibitory effect of base is probably related to the strong adsorption of acetate on the active sites.



**Table S4.** Structures of alkenes and corresponding products for Tables 6 and 7.

| Substrate              | Main products                                                                                                                                                                                                                                                                                    |
|------------------------|--------------------------------------------------------------------------------------------------------------------------------------------------------------------------------------------------------------------------------------------------------------------------------------------------|
| Cyclooctene            | 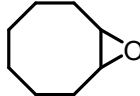                                                                                                                                                                                                              |
| Caryophyllene          |                                                                                                                                                                                                               |
| 3-Carene               |   <br>e      -diol      -olon      epoxid |
| Limonene               |  <br>1,2-epoxide (endo)      7,8-epoxide (exo)                                                                              |
| Methyl oleate          |                                                                                                                                                                                                              |
| <i>cis</i> -Stilbene   | <br>cis-epoxide                                                                                                                                                                                             |
| <i>trans</i> -Stilbene | <br>trans-epoxide                                                                                                                                                                                           |
| Styrene                |                                                                                                                                                                                                             |
| Carvone                |  <br>1,2-epoxide (endo)      7,8-epoxide (exo)                                                                          |

**Table S5.** Effect of solvent on 3-carene oxidation with H<sub>2</sub>O<sub>2</sub> over ZrW<sub>2</sub>O<sub>8</sub>

| Solvent | Time, min | 3-Carene Conversion, % | Epoxide Yield / Selectivity, <sup>a</sup> % | -diol + -olon Yield / Selectivity, <sup>a</sup> % |
|---------|-----------|------------------------|---------------------------------------------|---------------------------------------------------|
| MeCN    | 240       | 30                     | 17 / 57                                     | 4 / 13                                            |
| DMC     | 180       | 37                     | 4 / 11                                      | 22 / 59                                           |
| EtOAc   | 180       | 31                     | 4 / 13                                      | 20 / 65                                           |

Reaction conditions: [3-carene] = 0.1 M, [H<sub>2</sub>O<sub>2</sub>] = 0.2 M, ZrW<sub>2</sub>O<sub>8</sub>-A 0.015 g, solvent 1 mL, 50 °C.

<sup>a</sup> Yield based on 3-carene converted.
